STUDY PROTOCOL

# The interplay of brain neurotransmission and mental fatigue: A research protocol

Y. Laurisa Arenales Arauz<sup>1\*</sup>, Jelle Habay<sup>1,2,3</sup>, Tjasa Ocvirk<sup>1,4</sup>, Ana Mali<sup>1,4</sup>, Suzanna Russell<sup>5,6,7</sup>, Uros Marusic<sup>4,8</sup>, Kevin De Pauw<sup>1,9</sup>, Bart Roelands<sup>1,9</sup>

**1** Faculty of Physical Education and Physiotherapy, Human Physiology and Sports Physiotherapy Research Group, Vrije Universiteit Brussel, Brussel, Belgium, **2** Research Foundation Flanders (FWO), Brussels, Belgium, **3** LIFE Department, Vital Signs and Performance Monitoring Research Unit, Royal Military Academy, Brussels, Belgium, **4** Institute for Kinesiology Research, Science and Research Centre Koper, Koper, Slovenia, **5** Faculty of Health Sciences, Sports Performance, Recovery, Injury and New Technologies Research Centre (SPRINT), Australian Catholic University, Brisbane, Queensland, Australia, **6** Australian Institute of Sport, Bruce, Australian Capital Territory, Performance Services, Canberra, Australia, **7** Sport Performance Innovation and Knowledge Excellence (SPIKE), Queensland Academy of Sport, Nathan, Queensland, Australia, **8** Department of Health Sciences, Alma Mater Europaea University, Maribor, Slovenia, **9** BruBotics, Vrije Universiteit Brussel, Brussels, Belgium

\* [Laurisa.arenales@vub.be](mailto:Laurisa.arenales@vub.be)

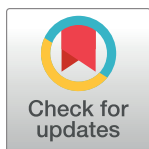

## OPEN ACCESS

**Citation:** Arenales Arauz YL, Habay J, Ocvirk T, Mali A, Russell S, Marusic U, et al. (2024) The interplay of brain neurotransmission and mental fatigue: A research protocol. PLoS ONE 19(9): e0310271. <https://doi.org/10.1371/journal.pone.0310271>

**Editor:** Hidenori Otani, Himeji Dokkyo University, JAPAN

**Received:** December 22, 2023

**Accepted:** August 27, 2024

**Published:** September 10, 2024

**Copyright:** © 2024 Arenales Arauz et al. This is an open access article distributed under the terms of the [Creative Commons Attribution License](https://creativecommons.org/licenses/by/4.0/), which permits unrestricted use, distribution, and reproduction in any medium, provided the original author and source are credited.

**Data Availability Statement:** Deidentified research data will be made publicly available when the study is completed and published. A data sharing plan will be made accordingly.

**Funding:** Bart Roelands FWO\_WEAVE (G095422N) <https://www.fwo.be/en/fellowships-funding/international-collaboration/intra-european-research-projects/weave/> The FWO-WEAVE did not play any role in the study design, data collection, analysis, decision to publish or preparation of the manuscript.

## Abstract

### Introduction

Mental fatigue (MF) significantly affects both cognitive and physical performance. However, the precise mechanisms, particularly concerning neurotransmission, require further investigation. An implication of the role of dopamine (DA) and noradrenaline (NA) is stated, but empirical evidence for this theory still needs to be provided. To address this gap, we aim to investigate the role of brain neurotransmission in elucidating if, and how prolonged cognitive activity induces MF and its subsequent impact on cognitive performance.

### Methods

This study (registration number: G095422N) will adopt a randomized cross-over design with sixteen healthy participants aged 18–35 years. The sessions include a familiarization, two experimental (DA: 20mg Methylphenidate; NA: 8mg Reboxetine) conditions, and one placebo (lactose tablet: 10mg) condition. A 60-minute individualized Stroop task will be used to investigate whether, and how the onset of MF changes under the influence of reuptake inhibitors. Attention and response inhibition will be assessed before and after the MF-inducing task using a Go/NoGo task. The integration of physiological (electroencephalography, heart rate), behavioral (attention, response inhibition), and subjective indicators (scales and questionnaires) will be used to detect the underlying mechanisms holistically. Data analysis will involve linear mixed models with significance at  $p < 0.05$ .

### Discussion

The integration of diverse techniques and analyses offers a comprehensive perspective on the onset and impact of MF, introducing a novel approach. Future research plans involve

**Competing interests:** The authors declared that no competing interests exist.

extending this protocol to explore the connection between brain neurotransmission and physical fatigue. This protocol will further advance our understanding of the complex interplay between the brain and fatigue.

## 1. Introduction

Mental fatigue (MF) is a multifaceted psychobiological state characterized by a sensation of tiredness and lack of energy [1,2]. It is commonly experienced during extended periods of demanding cognitive tasks, which can lead to impaired cognitive [3–5] and/or physical performance [6–8]. There is a wide range of causes that can trigger MF, such as prolonged cognitive work, medical conditions, lifestyle or work-related issues, in addition to emotional challenges and stress [9,10]. These causes indicate that MF is a symptom that can be experienced by the general population, ranging from healthy children to adults, athletes, and clinical populations.

Various phenomena across literature, such as ego depletion, cognitive fatigue, self-control depletion, or mental strain, exhibit similarities to MF [2]. The diverse definitions and research methods associated with MF lead to inconsistent findings regarding its onset and consequences [11]. In this research, we anticipate MF to arise after prolonged and demanding cognitive tasks, evident in subjective and neurophysiological parameters. As fundamental research regarding this state is still lacking, we hope to delve further into this aspect. These insights are vital for developing effective strategies to mitigate the adverse effects of MF on physical and/or cognitive performance [1,2].

Various hypotheses and speculations attempt to explain the mechanisms of MF and its subsequent effects. MF is rooted in the intricate interplay of neural networks and neurochemical processes within the brain [1,12–18]. Several studies have utilized electroencephalography (EEG) during mentally fatiguing tasks. A recent meta-analysis conducted by Tran et al. [17] underscored a consistent increase in theta and alpha power during MF. Additionally, event-related potentials (ERPs) have been a focal point of investigation. Across studies, a decline in the amplitude of N1 [4], N2 [19], and P3 [20] components has been observed with prolonged task engagement. Such observations suggest a potential top-down modulation of sensory processing for N1, reduced cognitive control for N2, and diminished attentional resources for P3. The precise role of brain neurotransmitters, such as dopamine (DA) and noradrenalin (NA), influencing these phenomena remains to be elucidated [15].

Brain DA plays a central role in reward, motivation, cognition, and motor control [21] and is the most commonly proposed substrate in relation to MF. This theory emerges from the ideas of Pageaux et al. [22,23], who stated that prolonged mental exertion could induce an accumulation of the neuromodulator adenosine, resulting in an increased perception of effort during subsequent exercise. Martin et al. [24] further extended this hypothesis by stating that the accumulation of adenosine hinders the release of DA in the anterior cingulate cortex, thereby impairing motivation or the willingness to exert effort. This notion also aligns with the suggestion that a possible reduction of extracellular brain DA contributes to MF by negatively affecting effort/reward evaluations and motivated behavior [13,25]. However, these theoretical hypotheses require further confirmation through robust empirical evidence.

More broadly, the manipulation of neurotransmitter systems through targeted reuptake inhibitors or supplements has been used extensively to manipulate extracellular brain neurotransmitter levels in exercise science research [26]. Moeller et al. [27] demonstrated the involvement of the dopaminergic midbrain in sustaining motivation during MF by using an

indirect DA agonist (methylphenidate) in healthy subjects. Furthermore, studies utilizing caffeine support its efficacy in reducing physical and cognitive performance declines associated with MF [28–31]. Caffeine has been shown to act as an adenosine antagonist that indirectly elevates brain DA levels [32]. The more profound exploration of the role of these, and other neurotransmitters, remains imperative for MF research [15]. Notably, research in the field of exercise-induced fatigue evidences the involvement of the noradrenergic brain neurotransmitter system in the onset of physical fatigue [33–36]. Increased concentrations of brain NA negatively impact physical performance capacity, accelerating the onset of physical fatigue [33–36]. These findings emphasize the complex involvement of brain neurochemistry in regulating fatigue. However, fundamental research on brain neurotransmission in MF remains limited.

Accordingly, this distinctive protocol employs a comprehensive research approach with the aim to target the proposed mechanisms of MF. We aim to investigate the role of brain neurotransmission in elucidating if, and how prolonged cognitive activity induces MF and its subsequent impact on cognitive performance. To achieve this, we will investigate subjective, behavior, and neurophysiological indicators. Based on previous findings [27–36], we anticipate a reduced onset and impact of MF following DA administration as opposed to a control condition. This may be reflected as lower perceived MF, less decline in ERPs, decreased alpha and theta band power, and improved cognitive performance with faster reaction times and higher accuracy. The opposite effect is expected for the administration of reuptake inhibitors targeting NA. The exact role of neurotransmitters on other brain dynamics [4,17,19] linked to MF remains explorative.

## 2 Materials and methods

The following protocol was made in accordance with the Standard Protocol Items: Recommendations for Interventional Trials (SPIRIT) recommendations of 2013 (S1 File) [37]. The current protocol is registered on ClinicalTrials.gov with protocol record number G095422N and identifier NCT05880342. The revised protocol (version 2), denoted as protocol number (2022-002836-30) received approval on March 15, 2023, by the Medical Ethics Committee of UZ Brussels (S2 File). Protocol alterations will be communicated to the Commission of Medical Ethics through amendments. All these amendments will be submitted through the DYCOFLOW system and subjected to approval by the commission. The proposed changes will only be implemented after the official approval.

### 2.1 Status and timeline

Fig 1 presents an overview of the study period. Recruitment commenced in April 2023, with the first participant familiarized with the protocol in May 2023. Data collection will conclude once we have successfully recruited 16 participants (8 male, 8 female). The objective is to complete data collection within approximately eight months (February 2024). Subsequently, analysis and results will be shared with the broader public through the publication of research manuscripts in reputable peer-reviewed scientific journals and presentations at conferences.

### 2.2 Study design and setting

The trial adopts a quasi-balanced, randomized, placebo-controlled, triple-blinded, cross-over design. Each experimental session comprises four consecutive trials encompassing one familiarization, two experimental conditions, and one control condition (Fig 2). In the experimental trials, reuptake inhibitors of DA and NA tablets will be administered, while a placebo tablet will be utilized in the control condition. The assignment of conditions (DA, NA, placebo) will be counterbalanced to mitigate the influence of order effects. To ensure adequate washout

|                                                                 | Enrolment and intervention |     |     |     | Close out |
|-----------------------------------------------------------------|----------------------------|-----|-----|-----|-----------|
| TIMEPOINT                                                       | 0                          | 2mo | 4mo | 6mo | 8mo       |
| <b>ENROLMENT:</b>                                               |                            |     |     |     |           |
| <b>[Prescreen Eligibility]</b>                                  | ◆                          |     |     |     | ◆         |
| <b>[Medical screening]</b>                                      | ◆                          |     |     |     | ◆         |
| <b>[Informed Consent]</b>                                       | ◆                          |     |     |     | ◆         |
| <b>[Familiarization]</b>                                        | ◆                          |     |     |     | ◆         |
| <b>INTERVENTIONS:</b>                                           |                            |     |     |     |           |
| <b>[Placebo condition]</b>                                      | ◆                          |     |     |     | ◆         |
| <b>[Dopamine condition]</b>                                     | ◆                          |     |     |     | ◆         |
| <b>[Noradrenalin condition]</b>                                 | ◆                          |     |     |     | ◆         |
| <b>ASSESSMENTS:</b>                                             |                            |     |     |     |           |
| <b>[EEG]</b>                                                    | ◆                          |     |     |     | ◆         |
| <b>[Cognitive GO/NOGO test]</b>                                 | ◆                          |     |     |     | ◆         |
| <b>[Stroop test]</b>                                            | ◆                          |     |     |     | ◆         |
| <b>[Heart rate]</b>                                             | ◆                          |     |     |     | ◆         |
| <b>[M-VAS, PSS-10, IPAQ-SF, NASA-TLX, KSS, MOTI-VAS, BRUMS]</b> | ◆                          |     |     |     | ◆         |
| <b>[Financial compensation]</b>                                 | ◆                          |     |     |     | ◆         |

**Fig 1. Schedule of enrolment, interventions, and assessments (SPIRIT 2013).** *Notes.* Enrolment, interventions, and assessments will be assessed throughout the measuring period.

<https://doi.org/10.1371/journal.pone.0310271.g001>

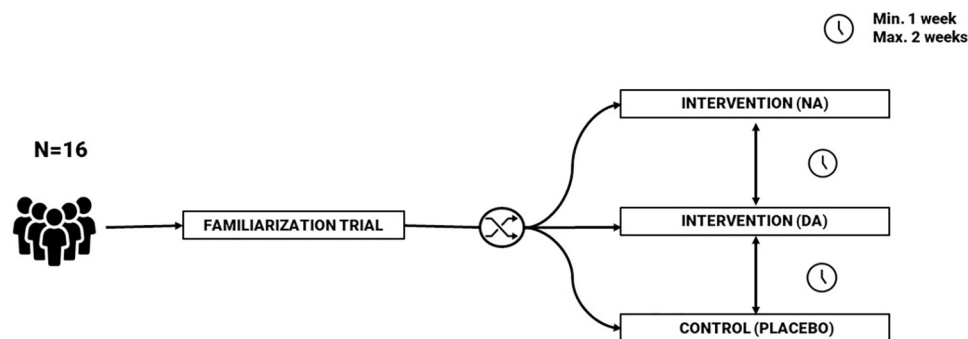

**Fig 2. Overview of the experimental design.**

<https://doi.org/10.1371/journal.pone.0310271.g002>

periods and minimize carryover effects, a minimum of one week and a maximum of two weeks will be targeted between each trial. The trials will be conducted within the cognitive research laboratory at research group MFYS (Vrije Universiteit Brussels, Generaal Jacqueslaan 271). Trained staff (pre- and postdoctoral level) will undertake and supervise all experimental trials.

## 2.3 Participants

**Subjects.** Sixteen healthy male and female subjects aged 18–35 years will be recruited to participate in the study. Recruitment strategies will involve word-of-mouth promotion, flyer distribution, and utilization of social media platforms. Participants will complete an online pre-screening questionnaire in the Research Electronic Data Capture (REDCap) system (see "Data collection and management") with specific eligibility criteria outlined. The specific eligibility criteria are displayed in Table 1. Recruited participants who meet the eligibility criteria established via screening questionnaires will receive the participant information form. Information folder that thoroughly outlines the specifics of our research.

**Safety considerations.** To ensure the safety of all participants, we will implement a comprehensive risk minimization protocol. Prior to participating in the study, all potential

**Table 1. Participant criteria.**

| Inclusion criteria                                                              | Exclusion criteria                                                               |
|---------------------------------------------------------------------------------|----------------------------------------------------------------------------------|
| Aged 18–35 years                                                                | Pregnancy                                                                        |
| Healthy male and female individuals (exercise $\geq 1$ x week)                  | Allergies to specific substances utilized in the current study (lactose, gluten) |
| No use of medication <sup>1</sup>                                               | Injuries of any kind in the past 6 months that hinder participation              |
| No indication of risk in general fatigue, depression, and burn-out <sup>2</sup> | History of suffering from any mental/psychiatric disorder                        |
| Current non-smoker                                                              | Participating in any concomitant care or research trials                         |
|                                                                                 | Suffering from color vision deficiencies                                         |
|                                                                                 | Suffering from any chronic health condition diagnosed by a medical professional  |

<sup>1</sup> No chronic use of medication / no prescribed medication between or before trials / no use of non-prescribed occasional medication 24 hours prior to each trial. All forms of contraceptives are allowed.

<sup>2</sup> Indicated by a total score of  $\geq 2.59$  on the Burn out assessment tool (BAT) [38];  $>57$  on the Multidimensional fatigue inventory (MFI) [39,40];  $>16$  on the Beck depression inventory-II (BDI-II) [41].

<https://doi.org/10.1371/journal.pone.0310271.t001>

participants will undergo a thorough medical evaluation conducted by an experienced medical doctor. This assessment is designed to identify any pre-existing medical conditions or risk factors that might affect their eligibility for the study. If a potential medical condition or risk factor will be identified in a particular participant, they will be excluded from participation. Additionally, a qualified medical doctor will be on-site for each trial, to offer immediate assistance and guidance in case of any adverse reactions to the ingestion of NA or DA. Our safety reporting procedures have been developed in alignment with established templates from the University Hospital Brussels (UZ Brussels). These standardized adverse event forms are specifically designed to record and track any safety-related incidents or observations during the study.

**Randomization and blinding.** All participants will be required to perform all three experimental conditions (NA, DA, Placebo). The sequence of treatments (one, two, three) will be randomized and quasi-balanced using a web-based computer program ([www.randomization.com](http://www.randomization.com)) to account for potential order effects (S3 File). The pharmacy of UZ Brussels will assign medications (NA, DA, placebo) to a specific treatment number (1,2,3) within the allocation list. The complete list will be shared with two unrelated researchers from the broader research group, who are not involved in the execution of the project. This process will contribute to a triple-blinded design, effectively blinding the researchers, data analysts, and participants. Treatment allocation will only be communicated to the supervising medical specialist in cases of medication-induced adverse events or upon specific requests of participants. Unblinding procedures will be conducted after completion of data analysis.

## 2.4 Data collection and management

**Measurement devices.** To continuously measure brain activity, we will use an electroencephalography (EEG) amplifier device (LiveAmp, Brain Products Munich, Germany) equipped with 64 (2x32 channels) active electrodes attached to the LiveAmp actiCAP adapter. These electrodes will be positioned on the participants' scalp (Acticap slim/snap, Brain Products Munich, Germany) in accordance with the "10:20 International System" [42]. The sampling rate will be configured at 500 Hz (Brain Vision Recorder, Brain Products, Munich, Germany) while ensuring that electrode impedance remains below 25 k $\Omega$ . The visual stimuli and collection of cognitive task responses will be facilitated through triggers embedded within E-Prime 3.0 software (Psychology Software Tools, Pittsburgh, PA) via a trigger box. Heart rate measurements will be obtained using the Polar H10 (Polar Electro Finland), and the administration of questionnaires will be conducted online via REDCap using an electronic tablet.

**Outcome measures.** This protocol will include multiple physiological, behavioral and subjective measures during cognitive tasks (Table 2, Fig 3). For primary outcome measures, we will assess brain activity (EEG spectral frequency bands and visual evoked potentials), performance (accuracy and reaction time), and subjective MF (MF-visual analogue scale) during the MF-inducing task (Stroop task). Additionally, to evaluate the impact of MF on cognition, we will measure brain activity (visual evoked potentials) and performance (reaction time and accuracy) on the Go/NoGo task. Secondary outcome measures will include heart rate and self-administered questionnaires/scales that capture internal workload (NASA-tlx), sleepiness (KSS), motivation (MOTI-VAS), stress (PSS-10), and mood (BRUMS).

**Data storage and management.** Data of secondary outcome measures will be collected and managed using REDCap (Research Electronic Data Capture, Nashville) hosted at [UZ Brussel] [48,49]. REDCap is a secure web-based application that includes compliance with general data protection regulations. Each participant will be assigned an exclusive identity code, which will ensure pseudonymization. Behavioral and physiological data will be securely

Table 2. Measurements within the study protocol.

| Measurements                                                                                                                     | Description                                                                                                         |
|----------------------------------------------------------------------------------------------------------------------------------|---------------------------------------------------------------------------------------------------------------------|
| <b>Physiological</b>                                                                                                             |                                                                                                                     |
| • Brain activity: EEG power spectral density, EEG source localization, and VEPs during cognitive tasks [continuous] <sup>1</sup> | • Measured by Brain Vision Recorder                                                                                 |
| • Heart rate [continuous]                                                                                                        | • Measured by a heart rate monitor before, during, and after the Stroop task (Polar H10)                            |
| <b>Behavioral</b>                                                                                                                |                                                                                                                     |
| • Accuracy of cognitive tasks [continuous] <sup>1</sup>                                                                          | • Both Go and No/Go trials and normal and inhibitory stimuli of Stroop task will be assessed by Eprime 3.0 software |
| • Reaction time of cognitive tasks [continuous] <sup>1</sup>                                                                     | • Go trials and normal and inhibitory stimuli of Stroop task will be assessed* by Eprime 3.0 software               |
| <b>Subjective</b>                                                                                                                |                                                                                                                     |
| • Sleepiness: Karolinska sleepiness scale [43] [ordinal]                                                                         | • This scale involves a 10-points sleepiness scale from “extremely alert” to “extremely sleepy”*                    |
| • MF: VAS scale 0–100 [44] [continuous] <sup>1</sup>                                                                             | • This scale involves a rating of MF on a 10 cm line with “not at all” to “extremely”*                              |
| • Motivation: VAS scale 0–100 [44] [continuous]                                                                                  | • This scale involves a rating of motivation on a 10 cm line with “not at all” to “extremely motivated”*            |
| • Mood: BRUMS [45] [ordinal]                                                                                                     | • This scale features 24 mood descriptors with a 5-point Likert scale with “not at all” to “extremely”*             |
| • Subjective workload: NASA-tlx rating scale [46] [ordinal]                                                                      | • This scale is composed of six subscales assessing subjective workload*                                            |
| • Stress: PSS-10 [47] [ordinal]                                                                                                  | • The PSS-10 is a 10-item questionnaire evaluating the degree of perceived stress the last month*                   |

<sup>1</sup> Primary outcome measures.

Abbreviations: EEG = Electroencephalography; VEPs = Visual evoked potentials; KSS = Karolinska sleepiness scale; VAS: Visual analogue scale; MF = mental fatigue; BRUMS = Brunel Mood Scale; NASA-TLX = National Aeronautics and Space Administration Task Load Index = PSS = Perceived stress scale.

\* Measured by Redcap on an electronic tablet.

<https://doi.org/10.1371/journal.pone.0310271.t002>

stored on the VUB (Vrije Universiteit Brussels) SharePoint platform. Additionally, an external backup solution will be facilitated by an external hard drive. Data will be obtained for 20 years adhering to the Brain Imaging Data Structure (bids.neuroimaging.io/) within the sealed Synology database. The data stored will be kept in its original state and will be linked to the researcher’s contributor ID (ORCID) as well as the Digital Object Identifier (DOI) of the corresponding article. As for data sharing, Anonymized full datasets will be available through a public repository facilitated by our institution (VUB). This will result in FAIR (Findable, Accessible, Interoperable and Reusable) data of our study. Data in the present study will be managed confidentially, conform the general data protection regulation (GDPR) of 27 April 2016. Participating in this study will entail an agreement with the investigators to collect data and publish the subsequent results in scientific journals. Participants will maintain the right to inquire about the specific data gathered and request corrections if any errors will be identified. The participants will also retain the right to stop his/her participation in the study at any moment without reasoning.

## 2.5 Procedures

### First visit (familiarization).



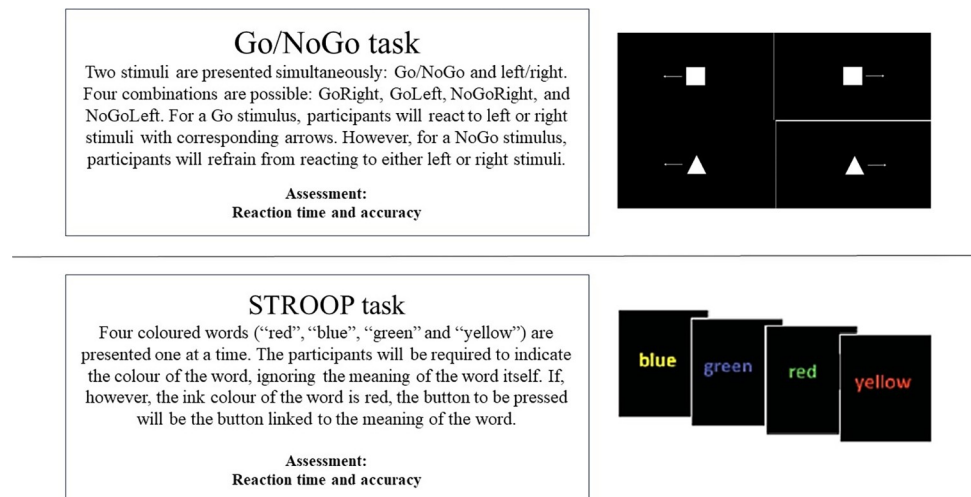

**Fig 3. Cognitive tasks assessed in the current protocol.**

<https://doi.org/10.1371/journal.pone.0310271.g003>

1. The participant receives a thorough explanation outlining the upcoming procedures, used terminology, and overarching objectives of the present study.
2. A medical specialist examines the participant through a system anamnesis, sportive anamnesis, familial anamnesis, medication and drug usage, general clinical examination, skinfold measurements and rest electrocardiogram.
3. The participant follows the informed consent procedure provided by YLAA.
4. The participant familiarizes with all questionnaires and cognitive tests in a sequence mirroring the actual experimental trials. The familiarization of the Stroop task consists of a determination of the participants' Stroop level to customize the intervention task [50,51]. This task is divided into 96-stimulus blocks, with accuracy calculated after each block. When accuracy exceeds 85%, difficulty will be adjusted by reducing the stimulus presentation time (SPT). The SPT decreases in the following order: 1100, 1000, 900, 800, 700, 600ms. If the SPT falls below 85% accuracy, the respective trial is designated as erroneous, prompting the subject to repeat the trial while maintaining the SPT. The trial is terminated if the participant makes three consecutive errors or accumulates five errors in total. The SPT of the last successfully completed block is considered as the maximum capacity of that individual and will be used to individualize the difficulty of the 60-minute Stroop task in the following trials.
5. The participant is debriefed and scheduled for subsequent experimental appointments.
6. The researcher distributes a pre-test checklist via email 48 hours in advance of each trial. The purpose of this checklist is to remind participants to remain adherent to the eligibility criteria throughout the trials (no use of medication, no smoking etc). In addition, participants will be asked to eat a similar dinner, avoid the use of caffeine, and limit heavy exercise or activity efforts 24 hours prior to the trial.

**Experimental trials.** Fig 4 provides an overview of the entire experimental/control trials.

1. The researcher administers the pre-test checklist verbally



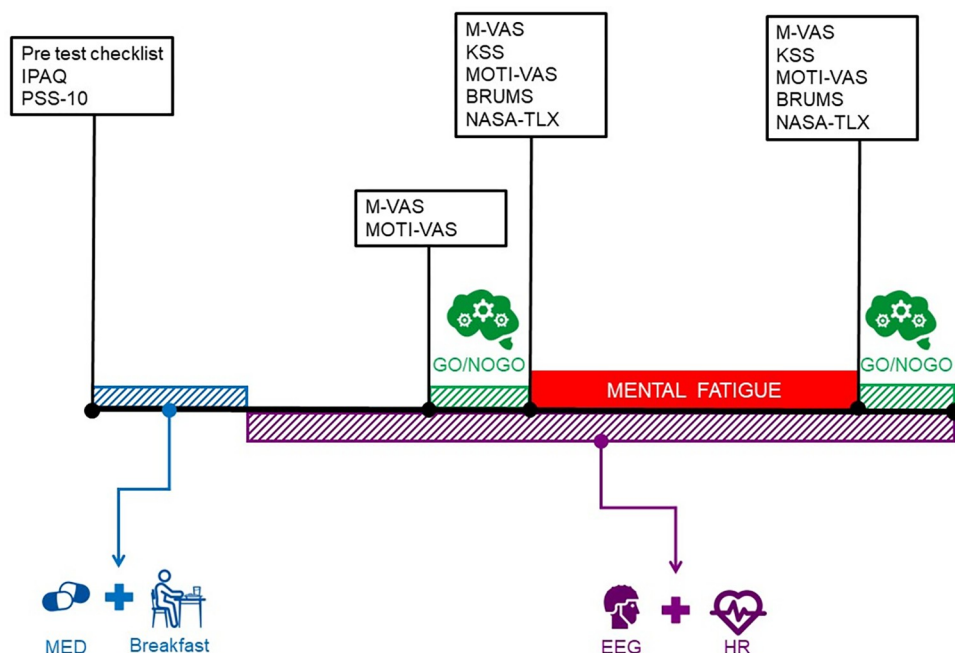

**Fig 4. Overview of the procedures within the experimental trials.** Abbreviations: MED = Medication; IPAQ-SF = international physical activity questionnaire short form; PSS = Perceived stress scale; M-VAS = Mental fatigue VAS-scale; KSS = Karolinska sleepiness scale; MOTI-VAS = Motivation VAS-scale; BRUMS = Brunel Mood Scale; NASA-TLX = National Aeronautics and Space Administration Task Load Index; EEG = Electroencephalography; HR = Heart rate.

<https://doi.org/10.1371/journal.pone.0310271.g004>

- The participant ingests the medication (see Table 3 for medication details).
- The participant completes the perceived stress scale (PSS-10) and the short version of the International Physical Activity Questionnaire-Short form (IPAQ-SF) [52] to check the level of activity in the past seven days.
- The participant digests the medication while they do a relaxing activity (e.g. watching a show, reading a book) by choice.
- After one hour, the participant consumes a standardized breakfast (S4 File).
- The researcher equips the participant with an the EEG cap and a heart rate monitor. Brain activity will be measured throughout the trial, whereas heart rate will be noted before, during (only for each block of the Stroop task), and after each cognitive task.

**Table 3. Overview of medications and dosages utilized in the present study.**

| Medication                             | Pharmacological substance | Type                                | Main targets | Total dosage    |
|----------------------------------------|---------------------------|-------------------------------------|--------------|-----------------|
| Ritalin 10 mg                          | Methylphenidate           | Neurotransmitter reuptake inhibitor | DA           | 2 pills (20 mg) |
| Edronax 4 mg                           | Reboxetine                | Neurotransmitter reuptake inhibitor | NA           | 2 pills (8 mg)  |
| P-Tabletten weiß 7 mm Lichtenstein 5mg | Lactose-Monohydrate       | Placebo                             | Lactose      | 2 pills (10 mg) |

Abbreviations: DA = Dopamine; NA = Noradrenaline.

<sup>a</sup> Both a DA and NA reuptake inhibitor.

<https://doi.org/10.1371/journal.pone.0310271.t003>

7. The researcher records a baseline EEG measurement for four minutes, with two minutes each for eyes open and eyes closed. This baseline captures the participant's resting-state brain activity and serves as a reference for detecting any changes during subsequent tasks. During the baseline, participants should minimize head movement, blinking, frowning, and any contact with their head to avoid noise/artifacts.
8. The participant completes the MF state and motivation scales.
9. The participant completes the pre-cognitive task (Go/NoGo).
10. The participant completes the pre-fatigue states of perceived MF, motivation, mood, MF, workload, and sleep.
11. The participant performs the MF-inducing intervention ( $\pm 60$  min Stroop task at a pre-determined level).
12. The participant completes the post-fatigue states of perceived MF, motivation, mood, MF, workload, and sleep.
13. The participant completes the post-cognitive task (Go/NoGo).
14. The researcher takes a second baseline EEG procedure for four minutes with eyes open (two minutes) and eyes closed (two minutes).

## 2.6 Statistical methods

**Sample size calculation.** A priori power analysis was conducted based on the results reported by Van Cutsem et al. 2022 ( $F(1,18) = 8.2$ ;  $p = .010$ ;  $\eta^2 = .313$ ) [53]. The reference study utilizes a comparable experimental design, participant population, and cognitive targets. Additionally, the underlying cognitive processes (response inhibition and cognitive control) targeted by the tasks are conceptually aligned. The sample size for this study was determined using G\*Power 3.1 Software [54]. The input parameters included a statistical test of MANOVA repeated measures within factors, a significance level of 0.05, a power of 0.95, and 3 measurements. Based on these parameters, the analysis indicated a sample of at least 15 subjects. We will include 16 participants to ensure a gender-balanced sample with equal proportions of male and female participants. This number also accounts for potential data loss due to unusable EEG recording caused by noise or technical issues.

**EEG data (pre)processing.** For EEG data analysis, an automated preprocessing pipeline [55,56] specified for each analysis (spectral analysis, ERPs, source localization) will precede machine learning processes. EEGLAB will be used to process the data further. All EEG data will be preprocessed and analyzed using the steps in the EEGLAB toolbox outlined in Delorme and Makeig (2004) [57] within the MATLAB software (The MathWorks, Inc., Natick, MA, United States, version MATLAB R2024a). We will use the standard 64-channel location, including the reference and the ground electrode (actiCAP, Brain Products gmbH, Gilching, Germany).

We will conduct EEG spectral analysis to discern variations in energy across various frequency components. Changes in spectral power will indicate alterations in brain activity related to cognitive tasks [58]. We plan to use the Fast Fourier Transform model to identify the power or amplitude of different frequency bands associated with various physiological and cognitive states within the EEG signal. Although we will consider all frequency bands, Tran et al. [17] identified the most consistent and significant alterations in alpha and theta wave activity, warranting a focused analysis of these frequency bands in our study.

Event-related potentials are time-locked modulations in the brain's electrical activity corresponding to specific sensory, motor, or cognitive event [5]. They arise as evoked responses within EEG recordings, reflecting the brain's reaction to specific stimuli. With prolonged task engagement, a decrease has been observed in the amplitude of visual evoked potentials in N1 [4], N2 [19], and P3 [20] components. While all components of visual evoked potentials during cognitive tasks will be examined, our primary focus will be on the N1, N2, and P3 components.

Source localization will be employed to estimate the brain regions where activity originates, based on EEG signals. Our aim is to investigate how the spatial distribution of brain activity shifts during various cognitive tasks or in response to stimuli. The proposed method for source localization is sLORETA [58,59].

**Analysis of experimental data.** The normality of the data distribution will be assessed using the Shapiro-Wilk test, augmented by visual inspection through histogram plots. We intend to employ linear mixed models (LMMs) to analyze the influence of DA and NA on the impact and consequence of MF. Given the variability in our data and the diversity of our parameters, the specific composition of the LMM will depend on the characteristics of the dataset obtained. Nonetheless, our analysis will focus on primary outcome measures that are continuous in nature. We further anticipate to include both fixed and random factors in our LMM analysis. Fixed factors will encompass "Condition" (NA/DA/placebo) and "Time". Random factors will be used to account for individual variability and other sources of random variation within the dataset.

For secondary outcome measures, each scale (BRUMS, NASA-TLX, MOTI-VAS, PSS-10, KSS, Table 2) will be appropriately prepared and assessed by calculating mean scores for subscales (e.g., NASA-TLX, BRUMS) or sum scores (e.g., PSS-10, KSS) for each time instance. Next, a repeated measures ANOVA or a non-parametric alternative (Friedman test for data of ordinal level) will be conducted using "Condition" (NA, DA, placebo) and "Time" as within-subject factors to determine whether significant differences exist between conditions and across time points.

Data exploration, visualization, and statistical tests will be performed using R (version 4.1.2) [60], with significance set at  $p < 0.05$ . Necessary statistical software packages available in R, such as lme4 [61] for LMM, will be employed for each analyses.

### 3. Discussion

This experimental cross-over trial aims to investigate the role of brain neurotransmission in elucidating if, and how prolonged cognitive activity induces MF and its subsequent impact on cognitive performance. Outcome measures include brain activation patterns, behavioral, and subjective indicators of MF. Building upon prior research findings [27–36], our hypothesis posits a positive impact of DA on the onset and impact of MF. This means improved cognitive performance indicating lower reaction time and higher accuracy. In contrast, we expect an adverse effect of NA on cognitive performance compared to the control condition. A more thorough exploration into the precise influence of neurotransmission on MF-related brain activity patterns will provide a more detailed elucidation of the effects.

The present protocol possesses notable strengths. This will be the first study to investigate both DA and NA reuptake inhibitors in the onset and impact of MF. Prior MF research has primarily employed the use of reuptake inhibitors to explore cognitive or physical performance [26,62]. Moreover, we will implement a rigorous design to enhance the overall robustness of the research. These measures involve the implementation of triple blinding procedures, the incorporation of subjective, physiological, and behavioral measures, and the consideration

of various influencing factors. This will hold significance in the field of MF research, considering the complex nature of MF influenced by a wide array of factors and interindividual differences [63].

While this protocol provides valuable insights, it is important to acknowledge some limitations. First, various methods are employed in literature to induce MF [62]. These methodologies operate under the assumption that prolonged, demanding cognitive activities are responsible for inducing this form of fatigue. However, susceptibility to MF is contingent upon numerous factors that are challenging to control [63]. The consistency of the 60-minute Stroop task in inducing MF in individuals, along with its representation of real-life situations, warrants careful consideration. However, Based on current knowledge and integrated parameters, we will assess whether, and to what extent, MF is initially induced. Secondly, boredom is not separately investigated within our protocol. It is vital to consider the potential influence of boredom on the perception of MF, as highlighted by previous research [8,64]. The sensation of boredom is among the mood states assessed in the BRUMS administered both before and after the mentally fatiguing task. Hence, this factor will be carefully considered in our study.

This research further aims to contribute to the current scientific knowledge on MF in diverse ways. One of the contributions is the confirmation or debunking of the DA theory, as mentioned by Martin et al. [24]. Furthermore, to effectively detect, prevent, and counteract the detrimental effects of MF, it is crucial to identify the central mechanisms of MF. As proposed by Habay et al. [1], directing fundamental research efforts toward understanding brain mechanisms can significantly benefit both applied (sport-specific) and clinical science. Targeted interventions may be developed to boost cognitive resilience in those prone to MF, such as athletes, high-stakes professionals, and patients with cognitive impairments. The current protocol further underscores the significance of transparent reporting methods within MF studies contributing to transparency within the broader research community. Lastly, the present protocol serves as a foundation for future research. The involved research group intends to implement a similar protocol to investigate the link between brain neurotransmission in physical fatigue and the subsequent effects of MF on physical fatigue.

## Supporting information

**S1 File. Addressed items of the current protocol according to the SPIRIT 2013 checklist.**  
(PDF)

**S2 File. Approved experimental study protocol.**  
(PDF)

**S3 File. Randomization of medication order.**  
(PDF)

**S4 File. Standardized breakfast for each participant.**  
(PDF)

## Author Contributions

**Conceptualization:** Y. Laurisa Arenales Arauz, Jelle Habay, Uros Marusic, Kevin De Pauw, Bart Roelands.

**Investigation:** Y. Laurisa Arenales Arauz.

**Methodology:** Y. Laurisa Arenales Arauz, Jelle Habay, Tjasa Ocvirk, Uros Marusic, Kevin De Pauw, Bart Roelands.

**Project administration:** Y. Laurisa Arenales Arauz.

**Supervision:** Uros Marusic, Kevin De Pauw, Bart Roelands.

**Validation:** Jelle Habay.

**Visualization:** Y. Laurisa Arenales Arauz, Jelle Habay.

**Writing – original draft:** Y. Laurisa Arenales Arauz.

**Writing – review & editing:** Jelle Habay, Tjasa Ocvirk, Ana Mali, Suzanna Russell, Uros Marusic, Kevin De Pauw, Bart Roelands.

## References

1. Habay J, Van Cutsem J, Verschueren J, De Bock S, Proost M, De Wachter J, et al. Mental Fatigue and Sport-Specific Psychomotor Performance: A Systematic Review. *Sports Med.* 2021; 51(7):1527–48. <https://doi.org/10.1007/s40279-021-01429-6> PMID: 33710524
2. Proost M, Habay J, De Wachter J, De Pauw K, Rattray B, Meeusen R, et al. How to Tackle Mental Fatigue: A Systematic Review of Potential Countermeasures and Their Underlying Mechanisms. *Sports Med.* 2022; 52(9):2129–58. <https://doi.org/10.1007/s40279-022-01678-z> PMID: 35543922
3. van der Linden D, Frese M, Meijman TF. Mental fatigue and the control of cognitive processes: effects on perseveration and planning. *Acta Psychologica.* 2003; 113(1):45–65. [https://doi.org/10.1016/s0001-6918\(02\)00150-6](https://doi.org/10.1016/s0001-6918(02)00150-6) PMID: 12679043
4. Faber LG, Maurits NM, Lorist MM. Mental fatigue affects visual selective attention. *PLoS One.* 2012; 7(10):e48073. <https://doi.org/10.1371/journal.pone.0048073> PMID: 23118927
5. Boksem MAS, Meijman TF, Lorist MM. Effects of mental fatigue on attention: An ERP study. *Cognitive Brain Research.* 2005; 25(1):107–16. <https://doi.org/10.1016/j.cogbrainres.2005.04.011> PMID: 15913965
6. Behrens M, Gube M, Chaabene H, Prieske O, Zenon A, Broscheid KC, et al. Fatigue and Human Performance: An Updated Framework. *Sports Med.* 2022. <https://doi.org/10.1007/s40279-022-01748-2> PMID: 36258141
7. Enoka RM, Duchateau J. Translating Fatigue to Human Performance. *Med Sci Sports Exerc.* 2016; 48(11):2228–38. <https://doi.org/10.1249/MSS.0000000000000929> PMID: 27015386
8. Van Cutsem J, Marcora S, De Pauw K, Bailey S, Meeusen R, Roelands B. The Effects of Mental Fatigue on Physical Performance: A Systematic Review. *Sports Medicine.* 2017; 47(8):1569–88. <https://doi.org/10.1007/s40279-016-0672-0> PMID: 28044281
9. Watt T, Groenewold M, Bjorner JB, Noerholm V, Rasmussen NA, Bech P. Fatigue in the Danish general population. Influence of sociodemographic factors and disease. *J Epidemiol Community Health.* 2000; 54(11):827–33. <https://doi.org/10.1136/jech.54.11.827> PMID: 11027196
10. Finsterer J, Mahjoub SZ. Fatigue in healthy and diseased individuals. *Am J Hosp Palliat Care.* 2014; 31(5):562–75. <https://doi.org/10.1177/1049909113494748> PMID: 23892338
11. Holgado D, Sanabria D, Perales JC, Vadillo MA. Mental Fatigue Might Be Not So Bad for Exercise Performance After All: A Systematic Review and Bias-Sensitive Meta-Analysis. *J Cogn.* 2020; 3(1):38. <https://doi.org/10.5334/joc.126> PMID: 33103052
12. Ishii A, Tanaka M, Watanabe Y. Neural mechanisms of mental fatigue. *Rev Neurosci.* 2014; 25(4):469–79. <https://doi.org/10.1515/revneuro-2014-0028> PMID: 24926625
13. Lorist MM, Bezdan E, ten Caat M, Span MM, Roerdink JB, Maurits NM. The influence of mental fatigue and motivation on neural network dynamics; an EEG coherence study. *Brain Res.* 2009; 1270:95–106. <https://doi.org/10.1016/j.brainres.2009.03.015> PMID: 19306850
14. Lorist MM, Boksem MAS, Ridderinkhof KR. Impaired cognitive control and reduced cingulate activity during mental fatigue. *Cognitive Brain Research.* 2005; 24(2):199–205. <https://doi.org/10.1016/j.cogbrainres.2005.01.018> PMID: 15993758
15. Meeusen R, Van Cutsem J, Roelands B. Endurance exercise-induced and mental fatigue and the brain. *Exp Physiol.* 2021; 106(12):2294–8. <https://doi.org/10.1113/EP088186> PMID: 32176398
16. Scholey E, Apps MAJ. Fatigue: Tough days at work change your prefrontal metabolites. *Current Biology.* 2022; 32(16):R876–R9. <https://doi.org/10.1016/j.cub.2022.06.088> PMID: 35998595
17. Tran Y, Craig A, Craig R, Chai R, Nguyen H. The influence of mental fatigue on brain activity: Evidence from a systematic review with meta-analyses. *Psychophysiology.* 2020; 57(5):e13554. <https://doi.org/10.1111/psyp.13554> PMID: 32108954

18. Fan X, Zhou Q, Liu Z, Xie F. Electroencephalogram assessment of mental fatigue in visual search. *Biomed Mater Eng*. 2015; 26 Suppl 1:S1455–63. <https://doi.org/10.3233/BME-151444> PMID: 26405908
19. Möckel T, Beste C, Wascher E. The Effects of Time on Task in Response Selection—An ERP Study of Mental Fatigue. *Sci Rep*. 2015; 5:10113. <https://doi.org/10.1038/srep10113> PMID: 26054837
20. Schmidt EA, Schrauf M, Simon M, Fritzsche M, Buchner A, Kincses WE. Drivers' misjudgement of vigilance state during prolonged monotonous daytime driving. *Accid Anal Prev*. 2009; 41(5):1087–93. <https://doi.org/10.1016/j.aap.2009.06.007> PMID: 19664450
21. Klein MO, Battagello DS, Cardoso AR, Hauser DN, Bittencourt JC, Correa RG. Dopamine: Functions, Signaling, and Association with Neurological Diseases. *Cell Mol Neurobiol*. 2019; 39(1):31–59. <https://doi.org/10.1007/s10571-018-0632-3> PMID: 30446950
22. Pageaux B, Lepers R, Dietz KC, Marcora SM. Response inhibition impairs subsequent self-paced endurance performance. *European Journal of Applied Physiology*. 2014; 114(5):1095–105. <https://doi.org/10.1007/s00421-014-2838-5> PMID: 24531591
23. Pageaux B, Lepers R. The effects of mental fatigue on sport-related performance. *Prog Brain Res*. 2018; 240:291–315. <https://doi.org/10.1016/bs.pbr.2018.10.004> PMID: 30390836
24. Martin K, Meeusen R, Thompson KG, Keegan R, Rattray B. Mental Fatigue Impairs Endurance Performance: A Physiological Explanation. *Sports Med*. 2018; 48(9):2041–51. <https://doi.org/10.1007/s40279-018-0946-9> PMID: 29923147
25. Boksem MAS, Tops M. Mental fatigue: Costs and benefits. *Brain Research Reviews*. 2008; 59(1):125–39. <https://doi.org/10.1016/j.brainresrev.2008.07.001> PMID: 18652844
26. Meeusen R, Roelands B. Fatigue: Is it all neurochemistry? *Eur J Sport Sci*. 2018; 18(1):37–46. <https://doi.org/10.1080/17461391.2017.1296890> PMID: 28317427
27. Moeller SJ, Tomasi D, Honorio J, Volkow ND, Goldstein RZ. Dopaminergic involvement during mental fatigue in health and cocaine addiction. *Transl Psychiatry*. 2012; 2(10):e176. <https://doi.org/10.1038/tp.2012.110> PMID: 23092980
28. Ataka S, Tanaka M, Nozaki S, Mizuma H, Mizuno K, Tahara T, et al. Effects of oral administration of caffeine and D-ribose on mental fatigue. *Nutrition*. 2008; 24(3):233–8. <https://doi.org/10.1016/j.nut.2007.12.002> PMID: 18178380
29. Azevedo R, Silva-Cavalcante MD, Gualano B, Lima-Silva AE, Bertuzzi R. Effects of caffeine ingestion on endurance performance in mentally fatigued individuals. *European Journal of Applied Physiology*. 2016; 116(11–12):2293–303. <https://doi.org/10.1007/s00421-016-3483-y> PMID: 27695980
30. Franco-Alvarenga PE, Brietzke C, Canestri R, Goethel MF, Hettinga F, Santos TM, et al. Caffeine improved cycling trial performance in mentally fatigued cyclists, regardless of alterations in prefrontal cortex activation. *Physiology & Behavior*. 2019; 204:41–8. <https://doi.org/10.1016/j.physbeh.2019.02.009> PMID: 30742838
31. Van Cutsem J, De Pauw K, Marcora S, Meeusen R, Roelands B. A caffeine-maltodextrin mouth rinse counters mental fatigue. *Psychopharmacology*. 2018; 235(4):947–58. <https://doi.org/10.1007/s00213-017-4809-0> PMID: 29247343
32. Fiani B, Zhu L, Musch BL, Briceno S, Andel R, Sadeq N, et al. The Neurophysiology of Caffeine as a Central Nervous System Stimulant and the Resultant Effects on Cognitive Function. *Cureus*. 2021; 13(5):e15032. <https://doi.org/10.7759/cureus.15032> PMID: 34150383
33. Klass M, Duchateau J, Rabec S, Meeusen R, Roelands B. Noradrenaline Reuptake Inhibition Impairs Cortical Output and Limits Endurance Time. *Med Sci Sports Exerc*. 2016; 48(6):1014–23. <https://doi.org/10.1249/MSS.0000000000000879> PMID: 26784275
34. Klass M, Roelands B, Lévénéz M, Fontenelle V, Pattyn N, Meeusen R, et al. Effects of noradrenaline and dopamine on supraspinal fatigue in well-trained men. *Med Sci Sports Exerc*. 2012; 44(12):2299–308. <https://doi.org/10.1249/MSS.0b013e318265f356> PMID: 22776872
35. Roelands B, Goekint M, Heyman E, Piacentini MF, Watson P, Hasegawa H, et al. Acute norepinephrine reuptake inhibition decreases performance in normal and high ambient temperature. *J Appl Physiol* (1985). 2008; 105(1):206–12. <https://doi.org/10.1152/japplphysiol.90509.2008> PMID: 18499777
36. Roelands B, Meeusen R. Alterations in central fatigue by pharmacological manipulations of neurotransmitters in normal and high ambient temperature. *Sports Med*. 2010; 40(3):229–46. <https://doi.org/10.2165/11533670-000000000-00000> PMID: 20199121
37. Chan AW, Tetzlaff JM, Gøtzsche PC, Altman DG, Mann H, Berlin JA, et al. SPIRIT 2013 explanation and elaboration: guidance for protocols of clinical trials. *Bmj*. 2013; 346:e7586. <https://doi.org/10.1136/bmj.e7586> PMID: 23303884



38. Schaufeli WB, Desart S, De Witte H. Burnout Assessment Tool (BAT)—Development, Validity, and Reliability. *International Journal of Environmental Research and Public Health*. 2020; 17(24):9495. <https://doi.org/10.3390/ijerph17249495> PMID: 33352940
39. Smets EMA, Garssen B, Bonke B, De Haes JCJM. The multidimensional fatigue inventory (MFI): psychometric qualities of an instrument to assess fatigue. *Journal of Psychosomatic Research*. 1995; 39(5):315–25. [https://doi.org/10.1016/0022-3999\(94\)00125-o](https://doi.org/10.1016/0022-3999(94)00125-o) PMID: 7636775
40. Manoli R, Chartaux-Danjou L, Delecroix H, Daveluy W, Moroni C. Is Multidimensional Fatigue Inventory (MFI-20) adequate to measure brain injury related fatigue? *Disabil Health J*. 2020; 13(3):100913. <https://doi.org/10.1016/j.dhjo.2020.100913> PMID: 32273197
41. Wang Y-P, Gorenstein C. Psychometric properties of the Beck Depression Inventory-II: a comprehensive review. *Revista Brasileira de Psiquiatria*. 2013; 35(4):416–31. <https://doi.org/10.1590/1516-4446-2012-1048> PMID: 24402217
42. H J. Report of the committee on methods of clinical examination in electroencephalography. *Electroencephalography and Clinical Neurophysiology*. 1958; 10(370–1).
43. Kaida K, Takahashi M, Akerstedt T, Nakata A, Otsuka Y, Haratani T, et al. Validation of the Karolinska sleepiness scale against performance and EEG variables. *Clin Neurophysiol*. 2006; 117(7):1574–81. <https://doi.org/10.1016/j.clinph.2006.03.011> PMID: 16679057
44. Wewers ME, Lowe NK. A critical review of visual analogue scales in the measurement of clinical phenomena. *Res Nurs Health*. 1990; 13(4):227–36. <https://doi.org/10.1002/nur.4770130405> PMID: 2197679
45. Parsons-Smith RL, Terry PC, Machin MA. Identification and Description of Novel Mood Profile Clusters. *Front Psychol*. 2017; 8:1958. <https://doi.org/10.3389/fpsyg.2017.01958> PMID: 29209245
46. Hernandez R, Roll SC, Jin H, Schneider S, Pyatak EA. Validation of the National Aeronautics and Space Administration Task Load Index (NASA-TLX) adapted for the whole day repeated measures context. *Ergonomics*. 2022; 65(7):960–75. <https://doi.org/10.1080/00140139.2021.2006317> PMID: 34766872
47. Cohen S, Kamarck T., & Mermelstein R. A global measure of perceived stress. *Journal of health and social behavior*. 1983; 4(24):385–96. PMID: 6668417
48. Harris PA, Taylor R, Minor BL, Elliott V, Fernandez M, O'Neal L, et al. The REDCap consortium: Building an international community of software platform partners. *J Biomed Inform*. 2019; 95:103208. <https://doi.org/10.1016/j.jbi.2019.103208> PMID: 31078660
49. Harris PA, Taylor R, Thielke R, Payne J, Gonzalez N, Conde JG. Research electronic data capture (REDCap)—a metadata-driven methodology and workflow process for providing translational research informatics support. *J Biomed Inform*. 2009; 42(2):377–81. <https://doi.org/10.1016/j.jbi.2008.08.010> PMID: 18929686
50. Habay J, Proost M, De Wachter J, Díaz-García J, De Pauw K, Meeusen R, et al. Mental Fatigue-Associated Decrease in Table Tennis Performance: Is There an Electrophysiological Signature? *Int J Environ Res Public Health*. 2021; 18(24). <https://doi.org/10.3390/ijerph182412906> PMID: 34948514
51. Proost M, Habay J, De Wachter J, De Pauw K, Marusic U, Meeusen R, et al. The Impact of Mental Fatigue on a Strength Endurance Task: Is there a Role for the Movement-Related Cortical Potential? *Med Sci Sports Exerc*. 2023.
52. Lee PH, Macfarlane D. J., Lam T. H., & Stewart S. M. Validity of the International Physical Activity Questionnaire Short Form (IPAQ-SF): a systematic review. *The international journal of behavioral nutrition and physical activity*. 2011; 8:115. <https://doi.org/10.1186/1479-5868-8-115> PMID: 22018588
53. Van Cutsem J, Van Schuerbeek P, Pattyn N, Raeymaekers H, De Mey J, Meeusen R, et al. A drop in cognitive performance, whodunit? Subjective mental fatigue, brain deactivation or increased parasympathetic activity? It's complicated! *Cortex*. 2022; 155:30–45. <https://doi.org/10.1016/j.cortex.2022.06.006> PMID: 35964356
54. Faul F, Erdfelder E, Lang AG, Buchner A. G\*Power 3: a flexible statistical power analysis program for the social, behavioral, and biomedical sciences. *Behav Res Methods*. 2007; 39(2):175–91. <https://doi.org/10.3758/bf03193146> PMID: 17695343
55. Peskar M, Omejc N, Šömen MM, Miladinović A, Gramann K, Marusic U. Stroop in motion: Neurodynamic modulation underlying interference control while sitting, standing, and walking. *Biol Psychol*. 2023; 178:108543. <https://doi.org/10.1016/j.biopsycho.2023.108543> PMID: 36931590
56. Marusic U, Peskar M, De Pauw K, Omejc N, Drevensek G, Rojc B, et al. Neural Bases of Age-Related Sensorimotor Slowing in the Upper and Lower Limbs. *Front Aging Neurosci*. 2022; 14:819576. <https://doi.org/10.3389/fnagi.2022.819576> PMID: 35601618



57. Delorme A, Makeig S. EEGLAB: an open source toolbox for analysis of single-trial EEG dynamics including independent component analysis. *J Neurosci Methods*. 2004; 134(1):9–21. <https://doi.org/10.1016/j.jneumeth.2003.10.009> PMID: 15102499
58. Zhang H, Zhou QQ, Chen H, Hu XQ, Li WG, Bai Y, et al. The applied principles of EEG analysis methods in neuroscience and clinical neurology. *Mil Med Res*. 2023; 10(1):67. <https://doi.org/10.1186/s40779-023-00502-7> PMID: 38115158
59. Pascual-Marqui RD. Standardized low-resolution brain electromagnetic tomography (sLORETA): technical details. *Methods Find Exp Clin Pharmacol*. 2002; 24 Suppl D:5–12. PMID: 12575463
60. Team RC. A Language and Environment for Statistical Computing Vienna, Austria2023 [Available from: <https://www.R-project.org>.
61. Douglas Bates MM, Ben Bolker, Steve Walker. Fitting Linear Mixed-Effects Models Using {lme4}. *Journal of Statistical Software*. 2015; 67(1): 1–48.
62. Van Cutsem J, Marcora S, De Pauw K, Bailey S, Meeusen R, Roelands B. The Effects of Mental Fatigue on Physical Performance: A Systematic Review. *Sports Med*. 2017; 47(8):1569–88. <https://doi.org/10.1007/s40279-016-0672-0> PMID: 28044281
63. Habay J, Uylenbroeck R, Van Droogenbroeck R, De Wachter J, Proost M, Tassignon B, et al. Interindividual Variability in Mental Fatigue-Related Impairments in Endurance Performance: A Systematic Review and Multiple Meta-regression. *Sports Med Open*. 2023; 9(1):14. <https://doi.org/10.1186/s40798-023-00559-7> PMID: 36808018
64. Liebherr M, Weiland-Breckle H, Grewe T, Schumacher PB. Cognitive performance under motor demands—On the influence of task difficulty and postural control. *Brain Res*. 2018; 1684:1–8. <https://doi.org/10.1016/j.brainres.2018.01.025> PMID: 29409797
